# Supplementary material for: Methplotlib: analysis of modified nucleotides from nanopore sequencing
Source: PubMed Central journal article supplement (PMC7214038; doi:10.1093/bioinformatics/btaa093), 2020-02-13
Supplement: btaa093_supplementary_data.pdf [file btaa093_supplementary_data.pdf]

## Supplementary figures

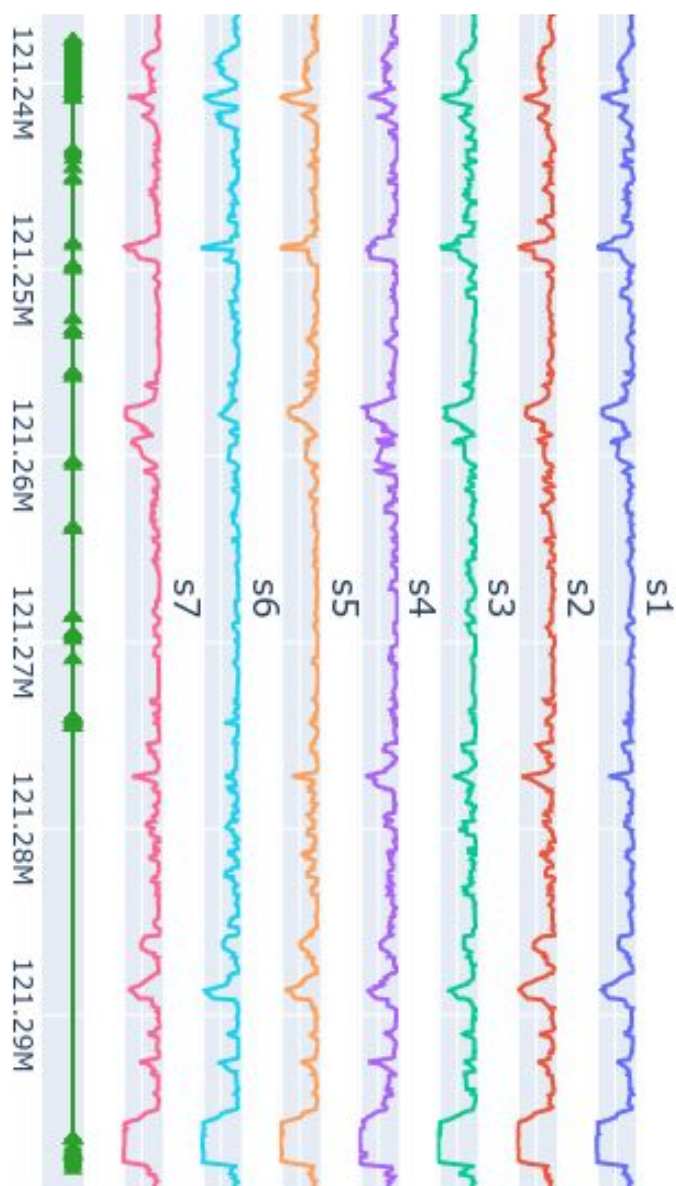

**Supplementary Figure S1: methylated frequency of multiple samples**

This plot shows the methylated frequency of 7 samples across the CAMKK2 gene.

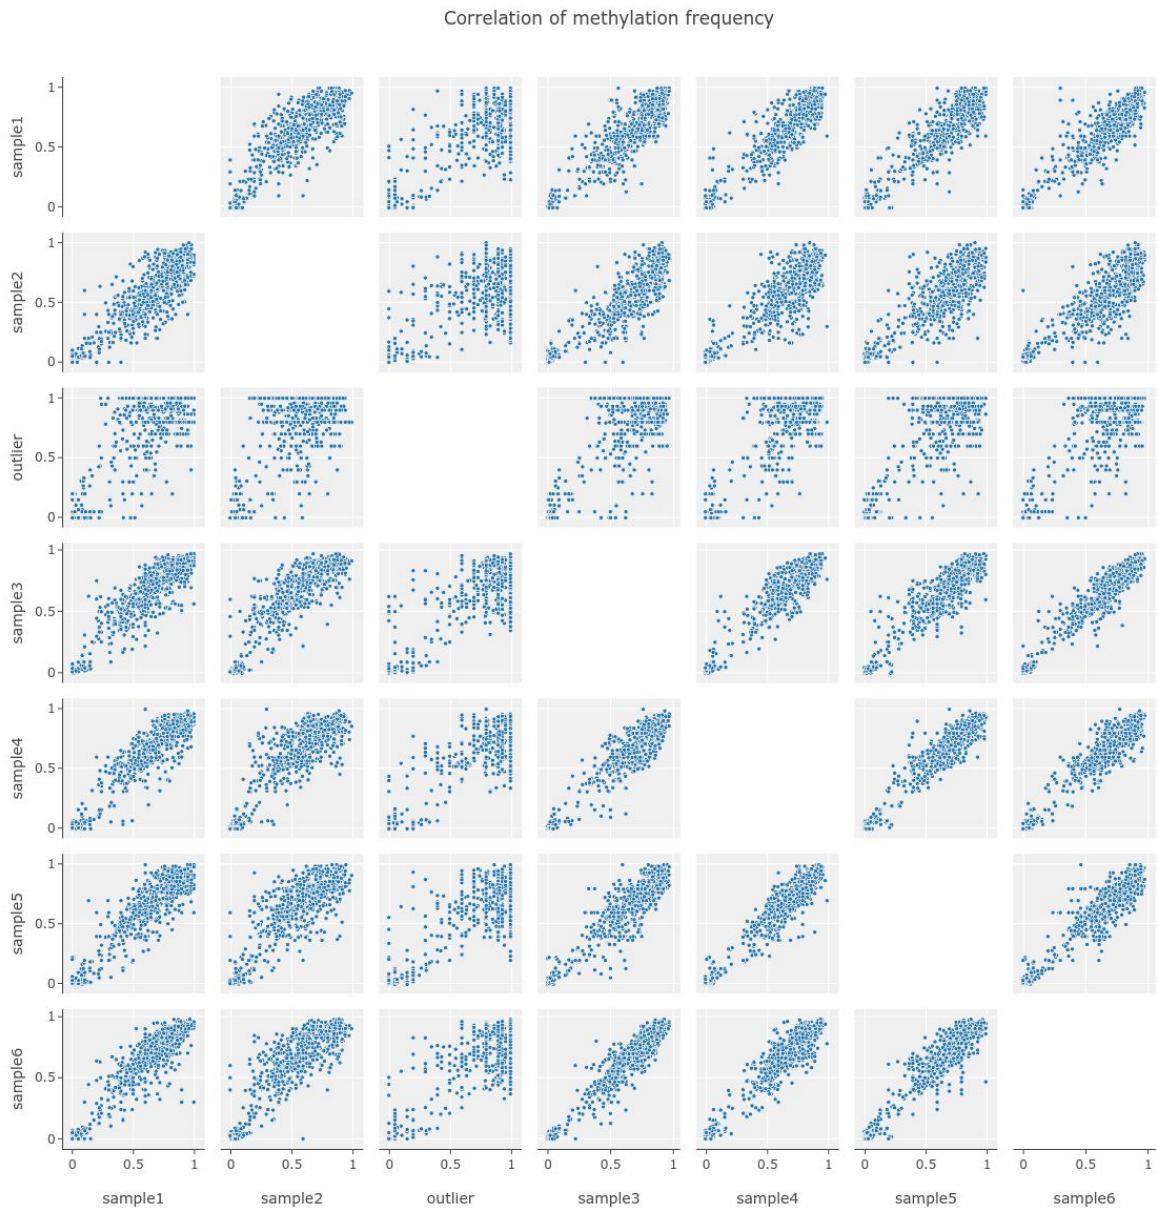

**Supplementary Figure S2: pairwise correlation plot**

Correlation of modification frequency across multiple datasets is plotted for each pair in the dataset, showing similarity for most samples with one notable outlier from a different tissue. All samples were sequenced on ONT PromethION.

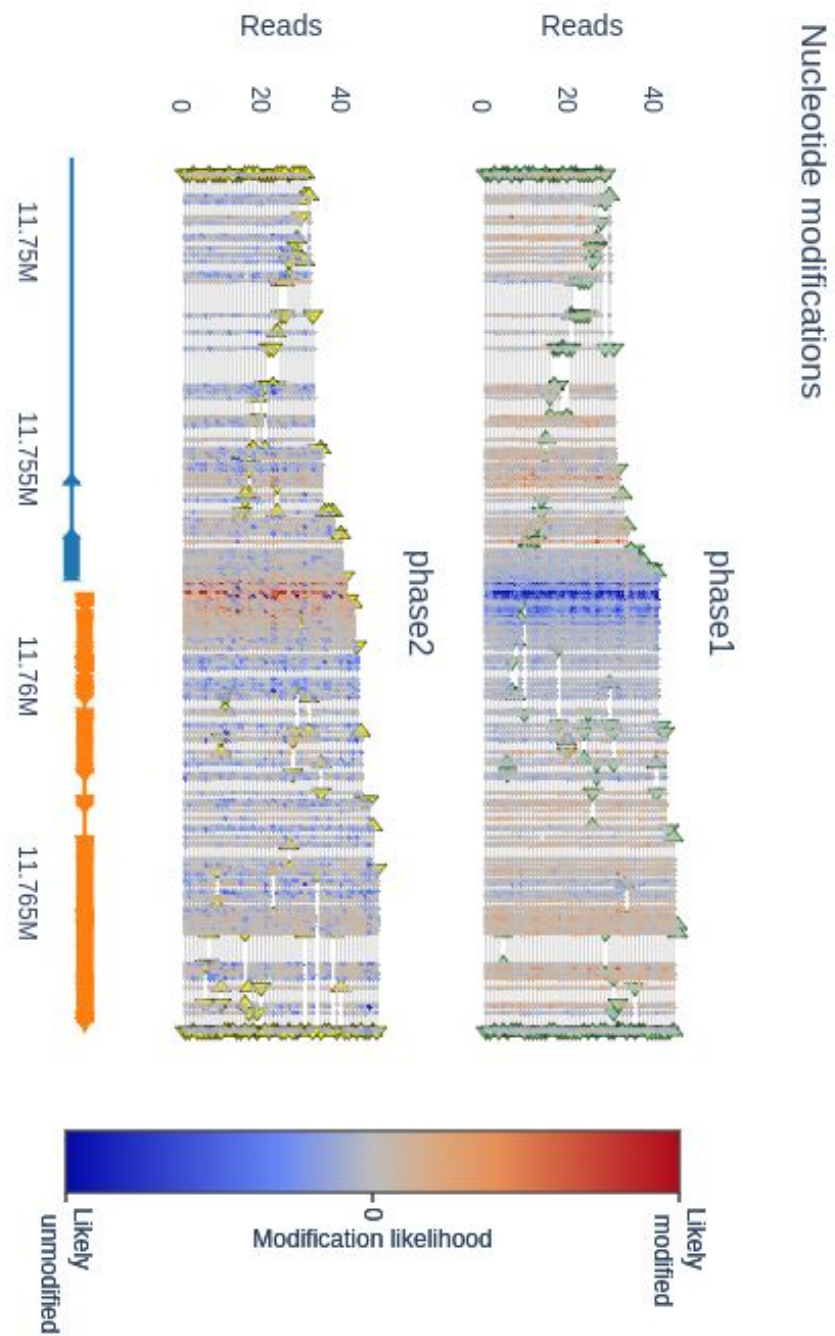

**Supplementary Figure S3: X-chromosome silencing**

Example of the MSL3 and AC004554.2 promoter, reads phased with WhatsHap

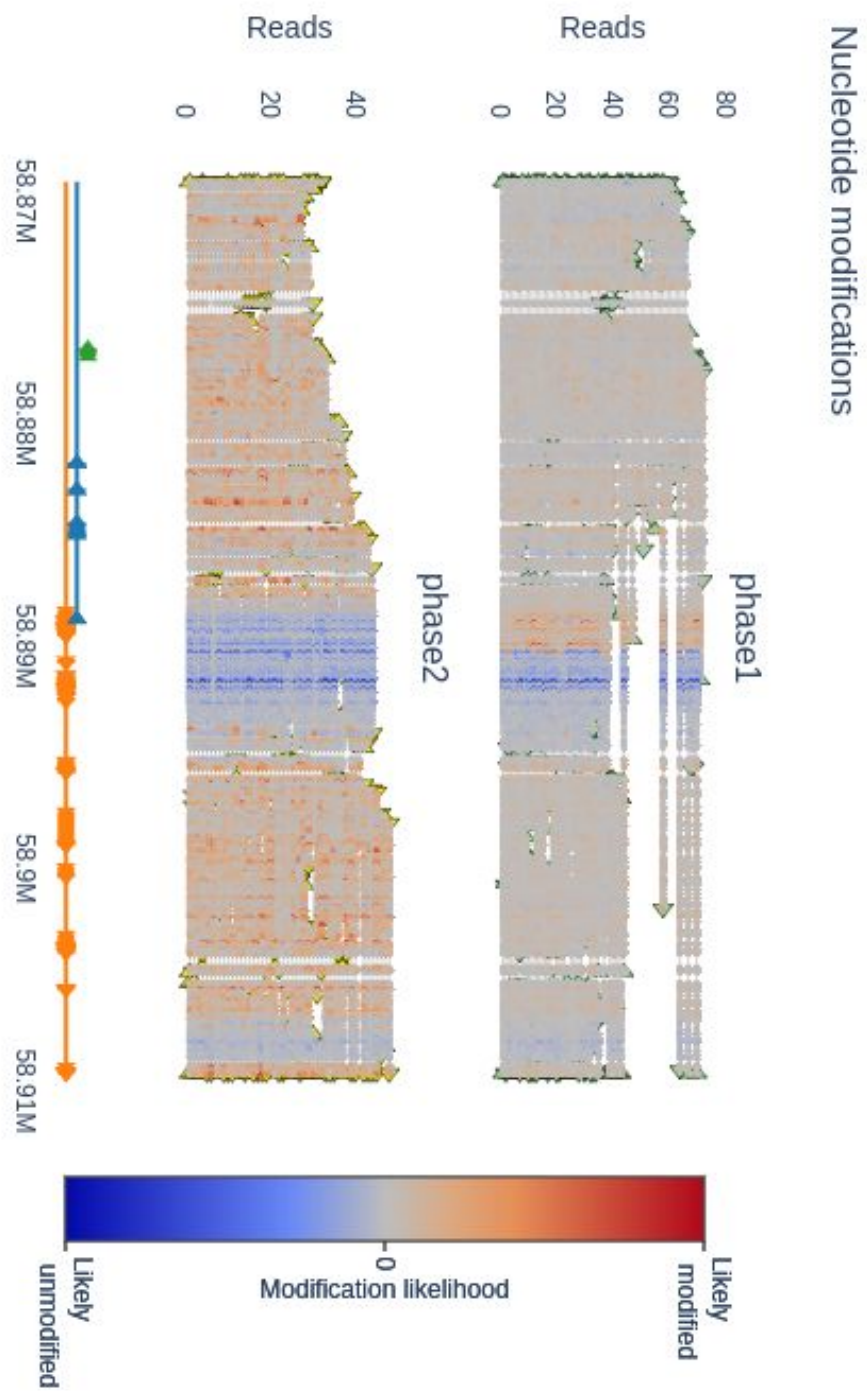

**Supplementary Figure S4: genomic imprinting**

Example of the GNAS/GNAS-AS locus, reads phased with WhatsHap
